# Supplementary material for: Catheters with Dual-Antimicrobial Properties by Gamma Radiation-Induced Grafting
Source: MDPI journal article supplement (doi:10.3390/pharmaceutics15030960), 2023-03-16
Supplement: s1 [file s1]

Supplementary material

# Catheters with dual-antimicrobial properties by gamma radiation-induced grafting

Lorena Duarte-Peña <sup>1,\*</sup>, Héctor Magaña <sup>2</sup> and Emilio Bucio <sup>1,\*</sup>

<sup>1</sup> Departamento de Química de Radiaciones y Radioquímica, Instituto de Ciencias Nucleares, Universidad Nacional Autónoma de México, Circuito Exterior, Ciudad Universitaria, Ciudad de México 04510, Mexico

<sup>2</sup> Facultad de Ciencias Químicas e Ingeniería, Universidad Autónoma de Baja California, Calzada Universidad 14418, Parque Industrial Internacional Tijuana, Tijuana 22390, Mexico

\* Correspondence: lorena.duarte@correo.nucleares.unam.mx (L.D.-P.); ebucio@nucleares.unam.mx (E.B.)

## 1. Calibration curve of ciprofloxacin load

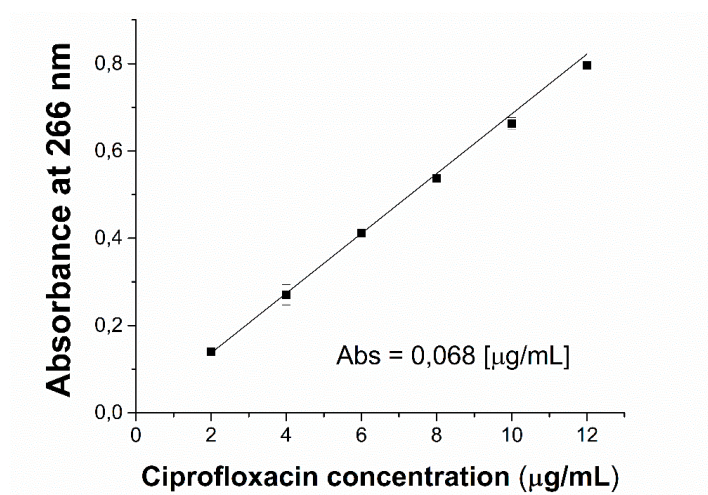

Figure S1. Calibration curves to quantify load of ciprofloxacin

## 2. Calibration curve of ciprofloxacin release

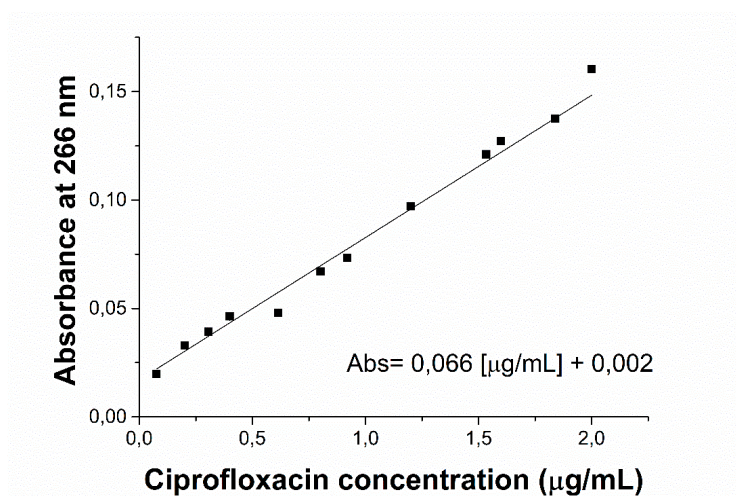

Figure S2. Calibration curves to quantify release of ciprofloxacin

**Citation:** Duarte-Peña, L.; Magaña, H.; Bucio, E. Catheters with Dual-Antimicrobial Properties by Gamma Radiation-Induced Grafting. *Pharmaceutics* **2023**, *15*, 960. <https://doi.org/10.3390/pharmaceutics15030960>

Academic Editor: Ana Isabel Fernandes

Received: 14 February 2023

Revised: 10 March 2023

Accepted: 14 March 2023

Published: date

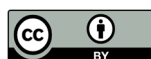

**Copyright:** © 2023 by the authors. Submitted for possible open access publication under the terms and conditions of the Creative Commons Attribution (CC BY) license (<https://creativecommons.org/licenses/by/4.0/>).

### 3. BSA quantification: working solution preparation

The working solution is a light green hue solution that consists of 50 parts of solution A and 1 part of solution B, Table S1 shows the grams of substances used for each solution.

Table S1. Working solution preparation

| Solution A<br>(100 mL at pH 11.25 adjusted with NaOH) | Solution B<br>(100 mL)                  |
|-------------------------------------------------------|-----------------------------------------|
| 0.1 g sodium bicarbonate                              |                                         |
| 2.0 g sodium carbonate dihydrate                      |                                         |
| 0.16 g sodium tartrate (dihydrate)                    | 4 g copper sulfate (II)<br>pentahydrate |
| 0.4 g sodium hydroxide                                |                                         |
| 0.95 g sodium bicarbonate                             |                                         |

### 4. BSA quantification: calibration curve

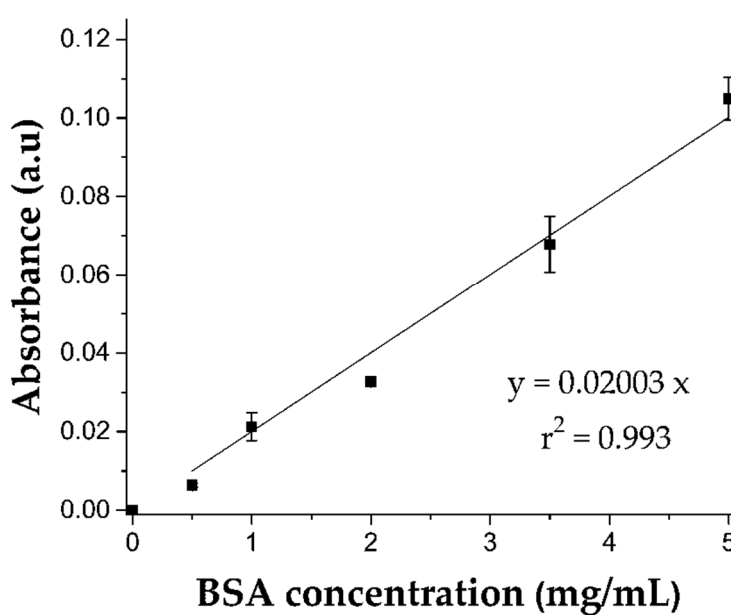

Figure S3. Calibration curve to BSA quantification (Abs 556 nm).

## 5. Parameters to select the drug release model

Table S2. Parameters to select the drug release model

| Parameter              | PVC-g-4VP <sub>4%</sub> /4VPPS <sub>32%</sub> | PVC-g-4VP <sub>10%</sub> /4VPPS <sub>13%</sub> | PVC-g-4VP <sub>16%</sub> /4VPPS <sub>22%</sub> |
|------------------------|-----------------------------------------------|------------------------------------------------|------------------------------------------------|
| Higuchi Model          |                                               |                                                |                                                |
| R <sup>2</sup>         | 0.982                                         | 0.980                                          | 0.963                                          |
| AIC                    | 57.96                                         | 80.47                                          | 71.98                                          |
| MSC                    | 3.003                                         | 0.779                                          | 2.156                                          |
| Korsmeyer-Peppas Model |                                               |                                                |                                                |
| R <sup>2</sup>         | 0.986                                         | 0.994                                          | 0.975                                          |
| AIC                    | 56.68                                         | 56.79                                          | 70.34                                          |
| MSC                    | 3.121                                         | 2.380                                          | 2.304                                          |
| Peppas-Sahlin Model    |                                               |                                                |                                                |
| R <sup>2</sup>         | 0.994                                         | 0.996                                          | 0.992                                          |
| AIC                    | 52.59                                         | 56.72                                          | 64.04                                          |
| MSC                    | 3.493                                         | 2.937                                          | 2.877                                          |

## 6. Profiles of ciprofloxacin load

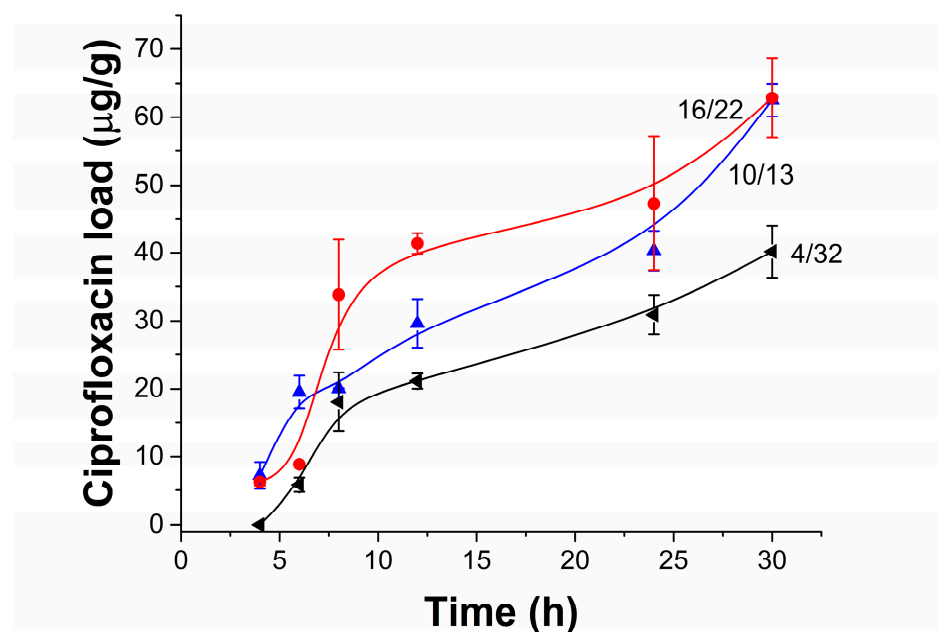

Figure S4. Profiles of ciprofloxacin load
